# Supplementary material for: Transcriptomics Reveals the Effect of Thymol on the Growth and Toxin Production of Fusarium graminearum
Source: MDPI journal article supplement (doi:10.3390/toxins14020142), 2022-02-15
Supplement: s1 [file s1]

## Article

# Transcriptomics Reveals the Effect of Thymol on the Growth and Toxin Production of *Fusarium graminearum*

Lian-Qun Wang, Kun-Tan Wu, Ping Yang, Fang Hou, Shahid-Ali Rajput, De-Sheng Qi and Shuai Wang

**Table S1.** Primer sequence of quantitative fluorescence PCR.

|              | Primer F (5'–3')       | Primer R (5'–3')       |
|--------------|------------------------|------------------------|
| EF1 $\alpha$ | CTTCTTTCACCGCTCAGGTC   | CTTGGAGGGAACCATCTTGA   |
| Tri5         | TTTTGGATGATAGCAGCGATG  | CGAAGGACGTTGGGAAAGTGT  |
| Tri6         | GCTTATCGCCCTTCCCACC    | ATGCCGCCTAAAGTCCCGT    |
| Tri8         | GATTTGAGAATGCCGAGCCT   | TTGAAATGGCTGTCGGTCGT   |
| Tri14        | CGAACCTGCTGCTCTTACCG   | TCGGTGGCGTGTCTCAGTTTAC |
| Tri101       | GCACAACAACCCCGACAAGT   | CGTAATCCCAGAGTCCCACC   |
| LEU1         | TACCAGTCAGAGGCTTCCGT   | GTGGTGGTATGACTGTGGCA   |
| 6PGD1        | CGAGTAAACACCTCCGCTATCT | GGTCAGTCCAACGCTGCAGT   |
| ERG6         | GAATGAGTTATCGGGAAAGGG  | GTTGGATGTGGTGTGTTGGTGA |

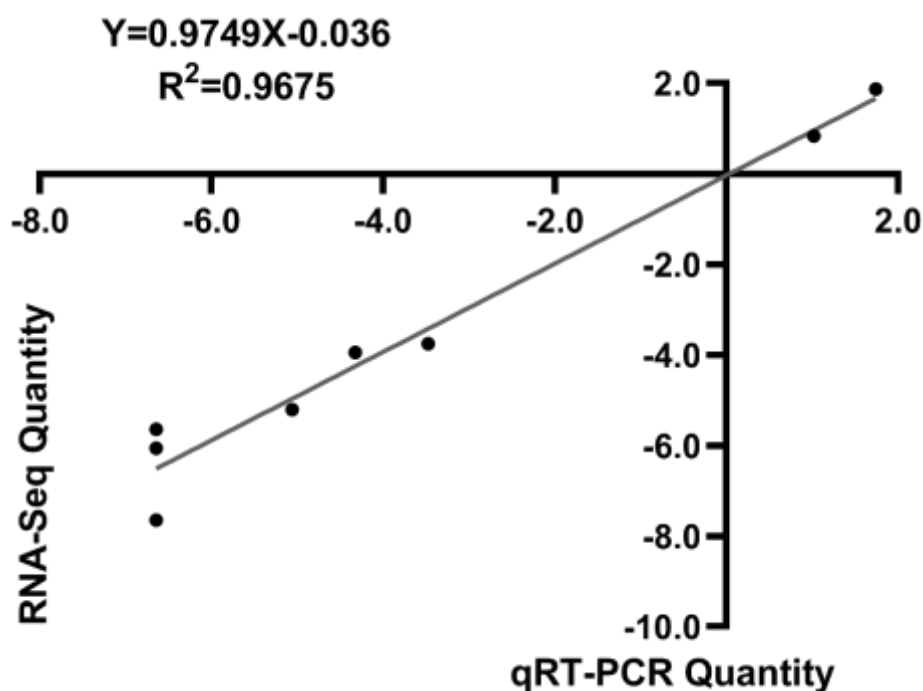

**Figure S1.** Comparison of gene expression (*Tri5*, *Tri6*, *Tri8*, *Tri14*, *Tri101*, *LEU1*, *6PGD1*, *ERG6*) levels based on RNA-seq and qRT-PCR.

**Table S2.** Unigenes related to the synthesis of secondary metabolites.

| Name | COG_ID  | FC   | Swiss-Prot_Description           | Functional Categories                |
|------|---------|------|----------------------------------|--------------------------------------|
| ABCC | COG3207 | 0.62 | ABC multidrug transporter C      | ABC transporters                     |
| ALDC | COG3527 | 3.01 | Alpha-acetolactate decarboxylase | $\alpha$ -acetolactate decarboxylase |

|       |             |       |                                                                   |                                               |
|-------|-------------|-------|-------------------------------------------------------------------|-----------------------------------------------|
| FAC13 | COG0318     | 0.33  | Long-chain-fatty-acid--CoA ligase FadD13                          | AMP-binding enzyme                            |
| CLR3  | COG0123     | 1.53  | Histone deacetylase clr3                                          | Arb2 domain;;Histone deacetylase domain       |
| MPAS  | COG3321     | 0.07  | Methylphloroacetophenone synthase                                 | Beta-ketoacyl synthase                        |
| AZAB  | ENOG410XNPJ | 2.40  | Highly reducing polyketide synthase azaB                          |                                               |
| AMO1  | COG3733     | 1.67  | Copper amine oxidase 1                                            | Copper amine oxidase, enzyme domain           |
| DLHH  | COG0412     | 4.77  | Putative carboxymethylenebutenolidase                             | Dienelactone hydrolase family                 |
| GSTK1 | COG3917     | 0.30  | Glutathione S-transferase kappa 1                                 | DSBA-like thioredoxin domain                  |
| CRTI  | COG1233     | 0.26  | Phytoene desaturase                                               | Flavin containing amine oxidoreductase        |
| MNS2  | ENOG410XP04 | 3.14  | Mannosyl-oligosaccharide 1,2-alpha-mannosidase                    | Glycosyl hydrolase family 47                  |
| HOS3  | COG0123     | 0.64  | Histone deacetylase H                                             | Histone deacetylase domain                    |
| TCMP  | COG3315     | 0.17  | Tetracenomycin polyketide synthesis O-methyltransferase TcmP      | Leucine carboxyl methyltransferase            |
| MET27 | COG0500     | 0.18  | Methyltransferase-like protein 27                                 | Methyltransferase domain                      |
| ARYL  | COG2162     | 16.00 | Arylamine N-acetyltransferase, liver isozyme                      | N-acetyltransferase                           |
| PLCD1 | ENOG410XPSW | 1.61  | 1-phosphatidylinositol 4,5-bisphosphate phosphodiesterase delta-1 | Phosphatidylinositol-specific phospholipase C |
| PLC1  | ENOG410XPSW | 0.45  | 1-phosphatidylinositol 4,5-bisphosphate phosphodiesterase 1       |                                               |
| FAD1  | COG0175     | 2.25  | Probable FAD synthase                                             | Phosphoadenosine reductase family             |
| CCD1  | COG3670     | 0.08  | Carotenoid 9,1                                                    | Retinal pigment epithelial membrane protein   |
| XANA  | COG2175     | 0.21  | Alpha-ketoglutarate-dependent xanthine dioxygenase xan-1          | Taurine catabolism dioxygenase TauD           |
| URIC  | COG3648     | 0.10  | Uricase                                                           | Uricase                                       |

Table S3. Unigenes related to glycolysis.

| Name  | COG_ID      | FC   | Swiss-Prot_Description                                      | Functional Categories                                         |
|-------|-------------|------|-------------------------------------------------------------|---------------------------------------------------------------|
| LEU1  | COG0119     | 2.03 | 2-isopropylmalate synthase                                  | Intracellular trafficking, secretion, and vesicular transport |
| DLD1  | COG0277     | 2.31 | D-lactate dehydrogenase, mitochondrial                      | Signal transduction mechanisms                                |
| PLC1  | ENOG410XPSW | 0.45 | 1-phosphatidylinositol 4,5-bisphosphate phosphodiesterase 1 | Secondary metabolites biosynthesis, transport and catabolism  |
| ADH   | COG1064     | 0.30 | Alcohol dehydrogenase                                       | Posttranslational modification, protein turnover, chaperones  |
| ALDOC | COG3588     | 4.76 | Fructose-bisphosphate aldolase C                            |                                                               |
| CATA  | COG0753     | 0.50 | Peroxisomal catalase                                        | Translation, ribosomal structure, and biogenesis              |
| HIBCH | COG1024     | 2.08 | 3-hydroxyisobutyryl-CoA hydrolase, mitochondrial            | Lipid transport and metabolism                                |
| DHCR7 | ENOG410XP67 | 0.24 | 7-dehydrocholesterol reductase                              |                                                               |

|        |             |      |                                                     |                                       |
|--------|-------------|------|-----------------------------------------------------|---------------------------------------|
| ACSA   | COG0365     | 2.16 | Acetyl-coenzyme A synthetase                        | Carbohydrate transport and metabolism |
| PHYT   | COG4247     | 0.12 | 3-phytase                                           |                                       |
| AGALB  | ENOG410XPF1 | 2.89 | Probable alpha-galactosidase B                      |                                       |
| HEX1   | COG3525     | 0.43 | Beta-hexosaminidase                                 |                                       |
| 6PGD1  | COG0362     | 3.35 | 6-phosphogluconate dehydrogenase, decarboxylating 1 |                                       |
| PME    | COG4677     | 2.57 | Pectinesterase                                      |                                       |
| INV2   | COG1621     | 2.54 | Beta-fructofuranosidase, insoluble isoenzyme 2      |                                       |
| BGLG_A | COG1472     | 2.97 | Probable beta-glucosidase G                         |                                       |
| CHI1   | COG3325     | 0.08 | Endochitinase 1                                     |                                       |
| TPSX   | COG1877     | 0.35 | Putative alpha,alpha-trehalose-phosphate synthase   |                                       |
| NAGA   | COG1820     | 0.16 | N-acetylglucosamine-6-phosphate deacetylase         |                                       |
| PHK    | COG3957     | 0.28 | Probable phosphoketolase                            |                                       |
| DAK1   | COG2376     | 3.47 | Dihydroxyacetone kinase 1                           |                                       |
| F16P   | COG0158     | 2.14 | Fructose-1,6-bisphosphatase                         | Nucleotide transport and metabolism   |
| YLX7   | COG1012     | 3.03 | Putative aldehyde dehydrogenase-like protein        |                                       |
| ENOA   | COG0148     | 3.51 | Alpha-enolase                                       | Energy production and conversion      |
| PCKG   | COG1274     | 2.68 | Phosphoenolpyruvate carboxykinase                   |                                       |
| FADH   | COG1062     | 4.18 | Zinc-binding dehydrogenase                          |                                       |
| PGK    | COG0126     | 5.90 | Phosphoglycerate kinase                             |                                       |

### Conidiation Assays

For conidiation Assays, ten mycelial plugs (6 mm diameter) taken from the periphery of a 3-day-old colony were transferred to a 250 mL flask containing 50 mL of carboxymethylcellulose sodium (CMC) liquid medium. The flasks were incubated in a shaker (180 rpm/min, 25 °C) for 7 days with the ambient laboratory light. After 7 days of cultivation, the liquid medium was filtered through three layers of sterile lens wiping paper, and the conidium was washed and resuspended with sterile water. The number of conidia was determined under microscopy by using a hemacytometer. The concentration of conidial suspension was adjusted to  $5 \times 10^5$  conidia/mL in sterile distilled water for subsequent experiments of the DON production and the transcriptome of *Fusarium graminearum*.

### Detection of DON and 3-Ac-DON

DON extraction and cleanup method, in brief, 5 g polyethylene glycol was added to the flask with a stopper containing 25 mL liquid medium, constant volume with water to 100 mL, the flask was placed in a shaker with 120 rpm/min for 30 min. After centrifuging at 3,000 rpm/min for 10 min, transfer 8 mL of the supernatant was passed slowly through an immunoaffinity column (M0608N3, Beijing Huaan Microbiotech Co., Ltd., Beijing, China) immunoaffinity cleanup, and 4 mL of the purified extract was evaporated to dryness under a nitrogen stream. The dry residue was then redissolved in 1 mL of a methanol/water mixture (50:50, v/v) and filtered through a 0.22 µm nylon membrane filter. After that, it was ready for analysis.

DON quantification method, in short, the high-performance liquid chromatography (HPLC) system (Agilent 1200, Santa Clare, CA, USA) with a reverse-phase symmetry C<sub>18</sub> column (5 µm, 150 × 4.6 mm, Agilent Eclipse XDB-C18) was applied to the quantitative analysis of DON and 3-Ac-DON. The column temperature was 30 °C, the mobile phase

was water/methanol (82:18, v/v), and the flow rate was 0.7 mL/min with an injection volume of 20  $\mu$ L. The detection wavelength was 218 nm, and the identification of DON or 3-Ac-DON was based on retention time decided by the peak time of the standard sample.

### Regression equation

The thymol concentration of 50% ( $EC_{50}$ ) and 90% ( $EC_{90}$ ) of mycelial growth inhibition rate was calculated by the regression equation with Data Processing System (DPS, Hangzhou Reifeng Information Technology Ltd, Hangzhou, China). The regression equation and correlation coefficient are shown in Figure S2.

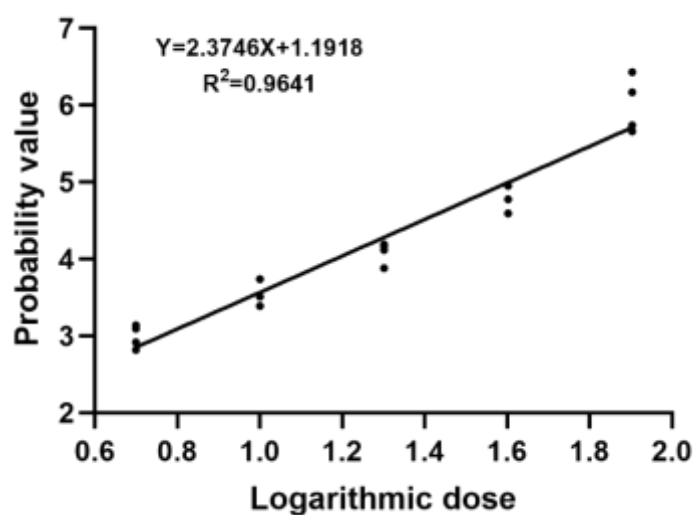

Figure S2. Sensitivity regression equation.
